# Supplementary material
Source: publisher figshare collection journal article supplement (https://acs.figshare.com/ndownloader/files/4183720)
Supplement: Supplementary file 1 [file 4183720]

# Supporting Information

## Ultra-thin Nanosheets of $\text{Li}_2\text{MSiO}_4$ (M=Fe, Mn) as High-Capacity Li-Ion Battery Electrode

*Dinesh Rangappa\*, Murukanahally Kempaiah Devaraju, Takaaki Tomai, Atsushi Unemoto, and Itaru Honma\**

Institute of Multidisciplinary Research for Advanced Materials, Tohoku University, 2-1-1, Katahira, Aoba-ku, Sendai 980-8577, Japan

\* [dineshrangappa@gmail.com](mailto:dineshrangappa@gmail.com); [i.honma@tagen.tohoku.ac.jp](mailto:i.honma@tagen.tohoku.ac.jp)

### Experimental Section

#### Synthesis

Commonplace and inexpensive solvents water and ethanol were used as supercritical fluid (SCF) medium. All chemicals were purchased from Wako Chemicals. Firstly, a precursor solution was prepared by dissolving  $\text{FeCl}_2 \cdot 4\text{H}_2\text{O}$  (0.1 mmol) and tetraethylorthosilicate in 15 ml ethanol at a constant temperature of 50 °C. Solutions of  $\text{LiOH} \cdot \text{H}_2\text{O}$  (0.4 mmol) and ascorbic acid (0.1 mmol) were prepared by dissolving each compound separately in 5 ml water. These solutions were slowly added to the precursor solution with constant stirring over a period of 1 h. In a typical synthesis, about 5 ml of precursor solution was charged into a 10 cc<sup>3</sup> volume stainless steel reactor and heated up to 350–420 °C at a pressure of 38 MPa for 4–10 min. The reaction was then terminated by quenching the reactor in a cold water bath. The resultant  $\text{Li}_2\text{MSiO}_4$  nanosheets were collected by repeated washing and centrifugation with ethanol, followed by drying in a vacuum oven at 120 °C for 12 h. The resulting products showed a highly crystalline nanosheet structure. The conductivity of the samples were improved by ball milling the dried samples with the conductive polymer (PEDOT 10 wt-%) and multiwall carbon nanotubes (5 wt-%) at 300 rpm for 12 h followed by mild heat treatment at 300 °C for 4 h in Ar atmosphere.

#### Material characterization

The crystal structures were examined by X-ray diffraction (XRD) analysis using a Bruker AXS D8 Advance instrument with Cu K $\alpha$  radiation. Crystal morphology was observed using high-resolution transmission electron microscopy (HRTEM; JEOL JEM-2010F). Atomic Force Microscopy (AFM) measurements were carried out using an S-image, Multi-Function unit. Sample suspensions were applied directly onto the substrate, which comprised a thin layer of native oxide on Si (100), by means of a spin coating method. After drying the substrate in a clean environment at room temperature, the measurements were performed in air at

ambient temperature and pressure. The X-ray photoelectron spectra were recorded using a PHI5600, ESCA System with monochromated Al X-rays. Electrochemical measurements were carried out using a Solartron Instrument Model 1287 system controlled by a computer.

### Electrochemical characterization

The electrochemical properties of  $\text{Li}_2\text{MSiO}_4$  nanosheets were studied using a beaker-type three-electrode cell assembly. The samples were vacuum dried overnight at 100 °C before assembling the cell. The dried  $\text{Li}_2\text{MSiO}_4$  nanosheet samples were mixed and ground with acetylene black and Teflon (poly(tetrafluoroethylene)) binder in a weight ratio of 85:10:5. The prepared paste was uniformly spread on a 0.1 cm<sup>2</sup> stainless steel SUS sheet (100 mesh). The cathode loading was 4–5 mg/cm<sup>2</sup>. Li metal on stainless steel SUS mesh was used as counter and reference electrodes. The electrolyte consisted of a solution of 1 M  $\text{LiClO}_4$  in ethylene carbonate (EC)/diethyl carbonate (DEC) (1/1 by volume). Cell assembly was carried out in a glove box filled with high-purity argon gas. The charge-discharge tests were performed with a Solartron Instrument Model 1287 controlled by a computer, in the potential range of 1.5–4.8 V versus Li under different current densities.

## Supporting Information Figures

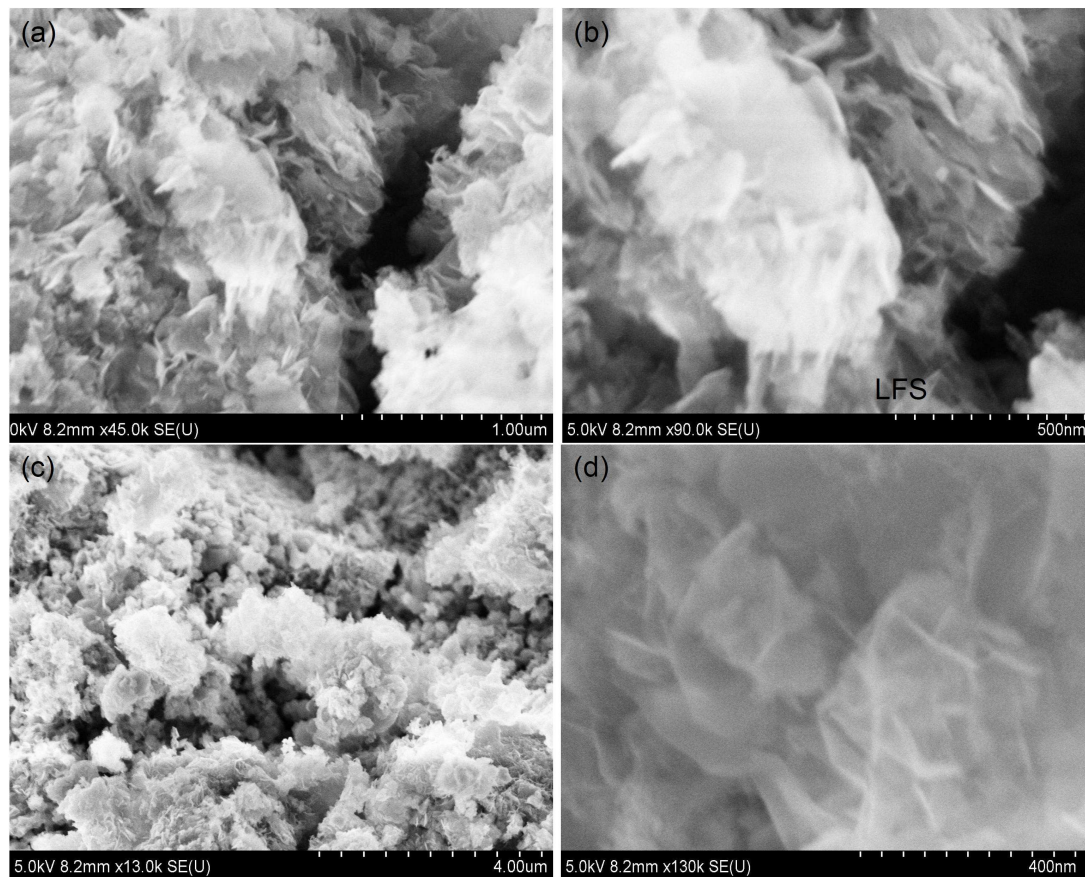

Figure S1. FE-SEM images of nanosheets samples: (a) – (b)  $\text{Li}_2\text{FeSiO}_4$ , and (c) – (d)  $\text{Li}_2\text{MnSiO}_4$  samples synthesized by supercritical fluid process at 400°C temperature for 10 min reaction time.

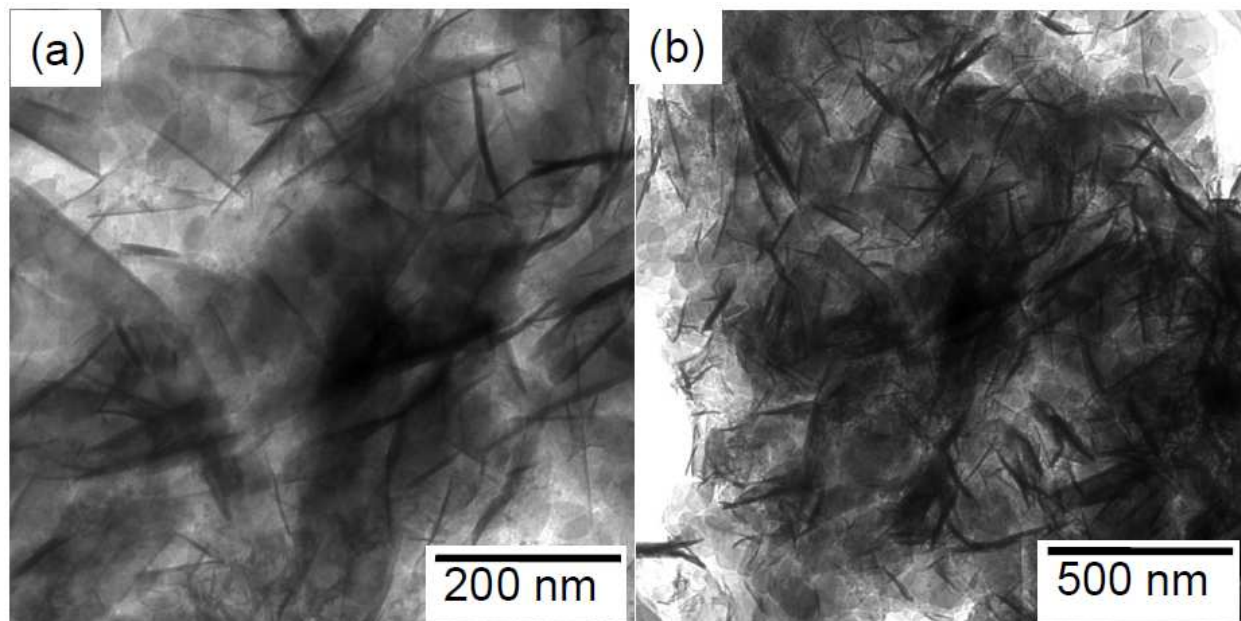

Figure S2. TEM image of lithium metal silicate samples containing mixture of nanosheets and nanoplates: (a)  $\text{Li}_2\text{FeSiO}_4$ , (b)  $\text{Li}_2\text{MnSiO}_4$  synthesized at 400 °C.

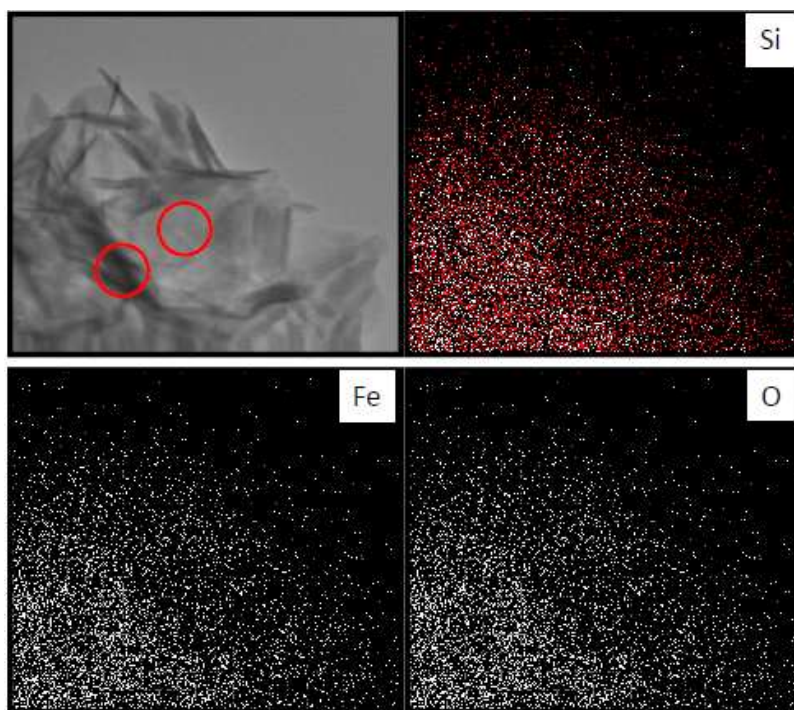

Figure S3. Elemental mapping of  $\text{Li}_2\text{FeSiO}_4$  nanosheets. Uniform distribution of Fe, Si, and O atoms throughout the sheets can be seen, which indicates that sheet morphology comprises of  $\text{Li}_2\text{FeSiO}_4$ .



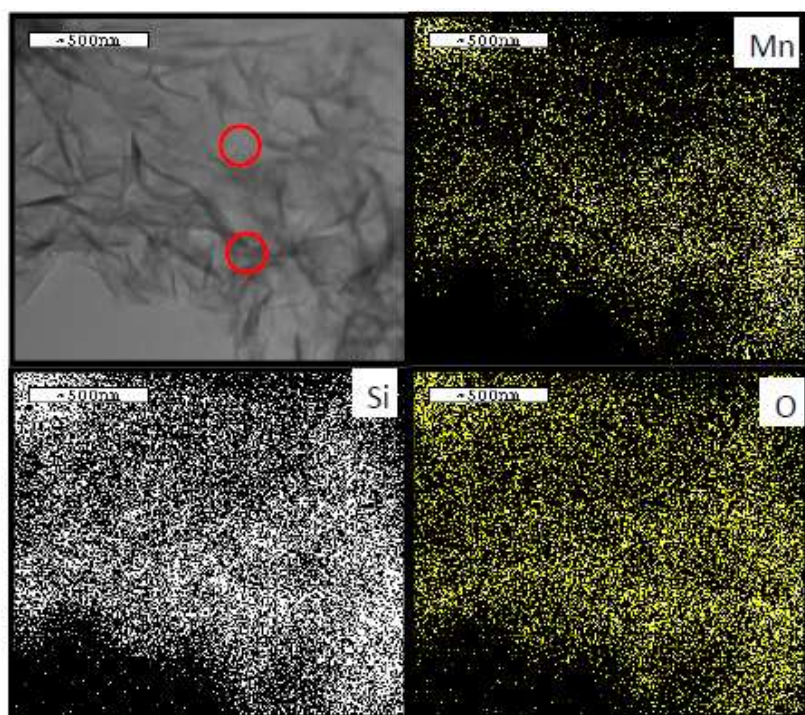

Figure S4. Elemental mapping of  $\text{Li}_2\text{MnSiO}_4$  nanosheets. Uniform distribution of Mn, Si, and O atoms throughout the sheets can be seen, which indicates that sheet morphology comprises  $\text{Li}_2\text{MnSiO}_4$ .

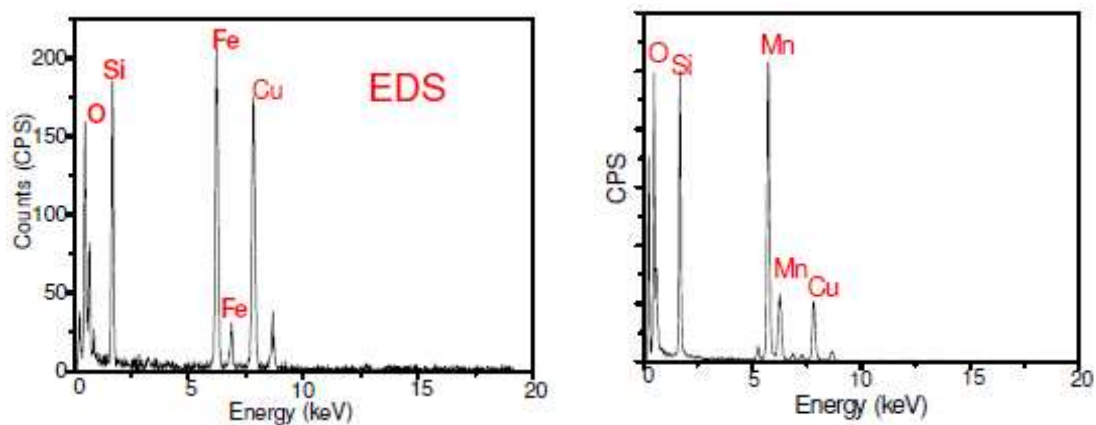

Figure S5. Energy dispersive spectra of  $\text{Li}_2\text{FeSiO}_4$  and  $\text{Li}_2\text{MnSiO}_4$  samples obtained by supercritical fluid process, at 400 °C temperature and 10 min reaction time.

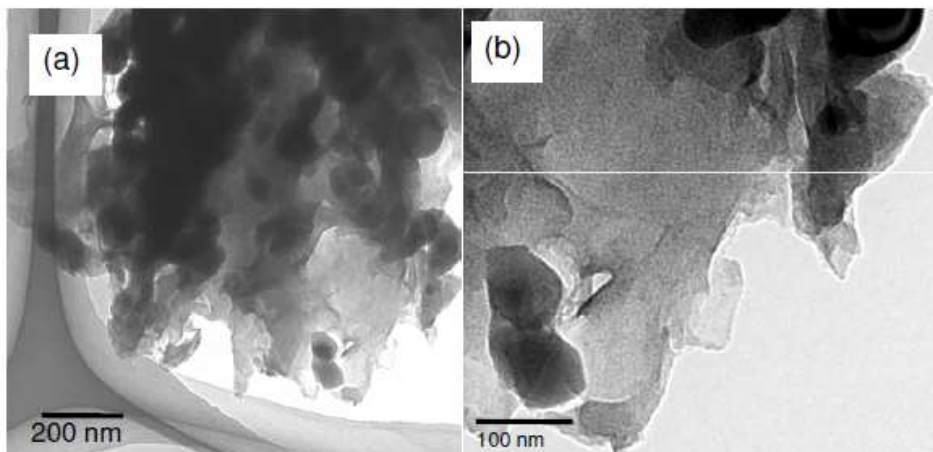

Figure S6. TEM images of  $\text{Li}_2\text{MnSiO}_4$  after ball milling at 300rpm followed by mild heat treatment at 300 °C for 4h, under Ar +  $\text{H}_2$  (5%) atmosphere.

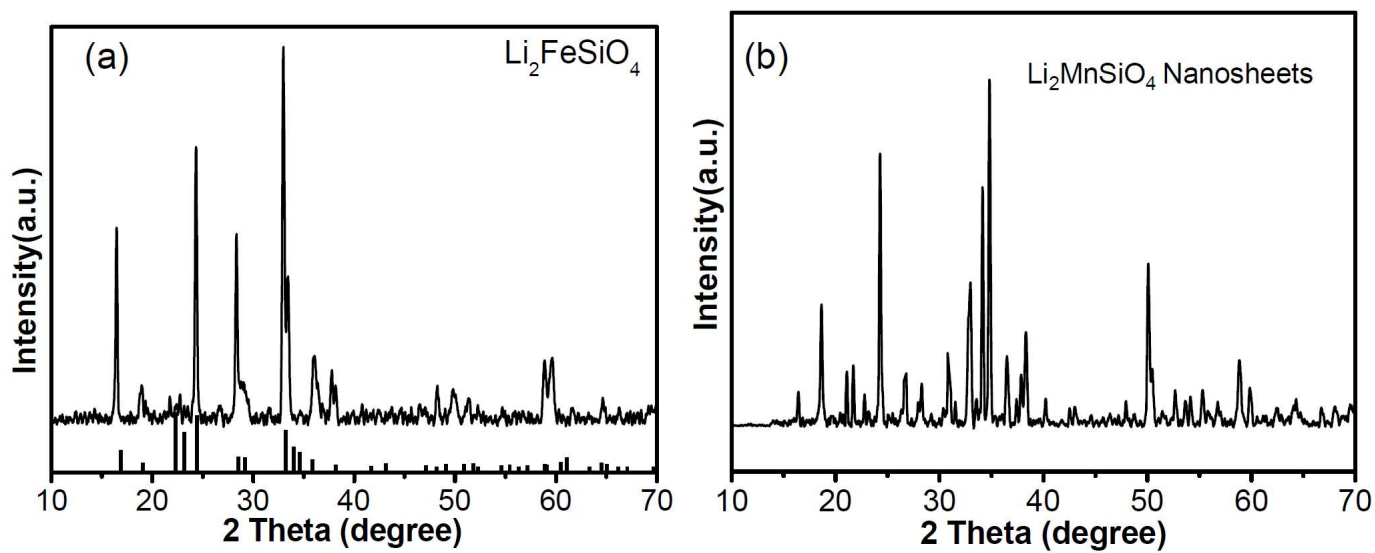

Figure S7. XRD patterns of (a)  $\text{Li}_2\text{FeSiO}_4$ , (b)  $\text{Li}_2\text{MnSiO}_4$  samples synthesized by supercritical fluid process at 400°C temperature for 10 min reaction time.

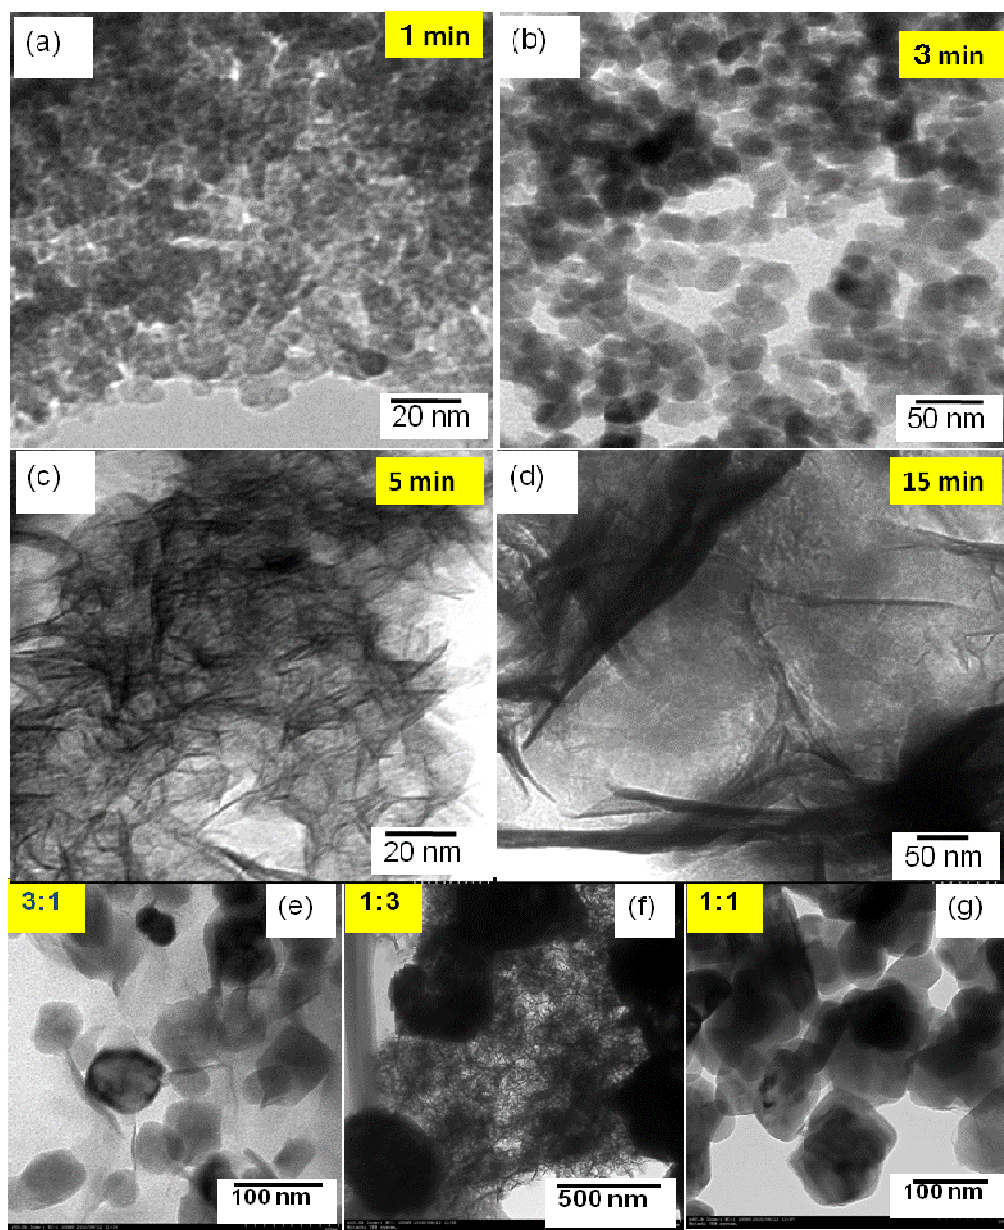

Figure S8. TEM images of  $\text{Li}_2\text{MnSiO}_4$  samples synthesized at various reaction times: (a) 1 min; (b) 3 minutes, (c) 5 min, (d) 15 min. Images (e)–(g) show the  $\text{Li}_2\text{MnSiO}_4$  samples synthesized using different solvent (water : ethanol) ratios at 400 °C.

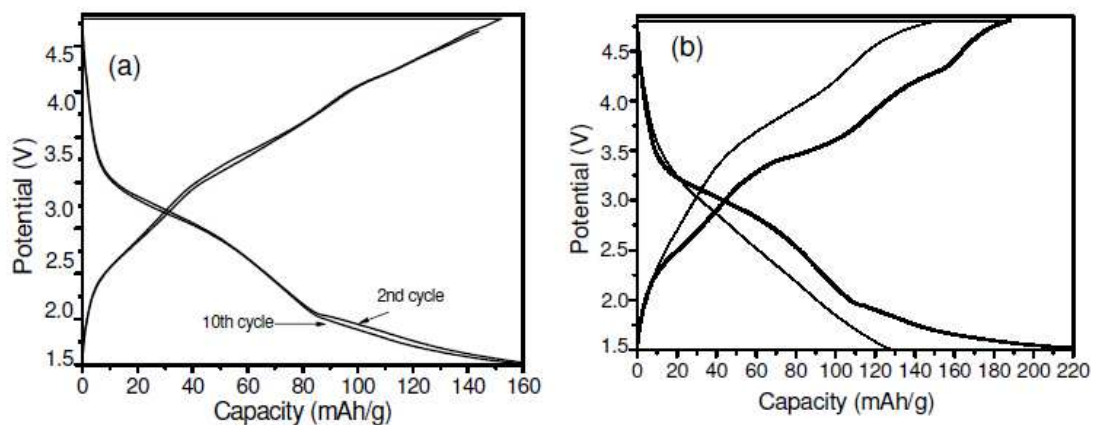

Figure S9. Charge-discharge profile of: (a)  $\text{Li}_2\text{FeSiO}_4$ , (b)  $\text{Li}_2\text{MnSiO}_4$  samples measured at room temperature. The current rate for charge-discharge measurement was 0.02C.

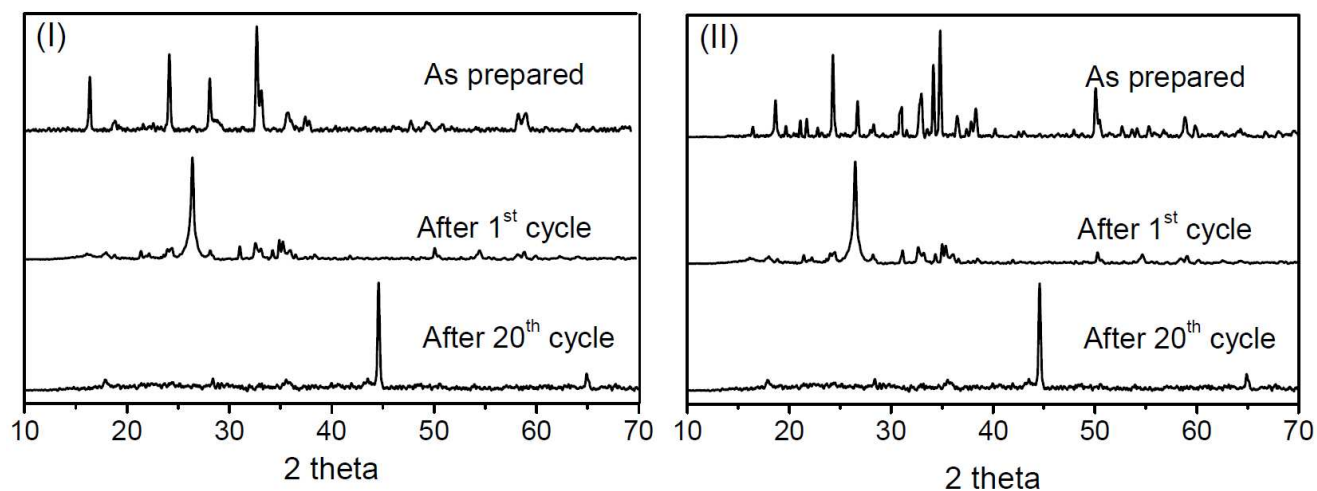

Figure S10. XRD patterns of lithium metal silicate samples before and after charge-discharge measurements: (I)  $\text{Li}_2\text{FeSiO}_4$  and (II)  $\text{Li}_2\text{MnSiO}_4$  electrode measured at 45 °C. The current rate for charge-discharge measurement was 0.02 C.

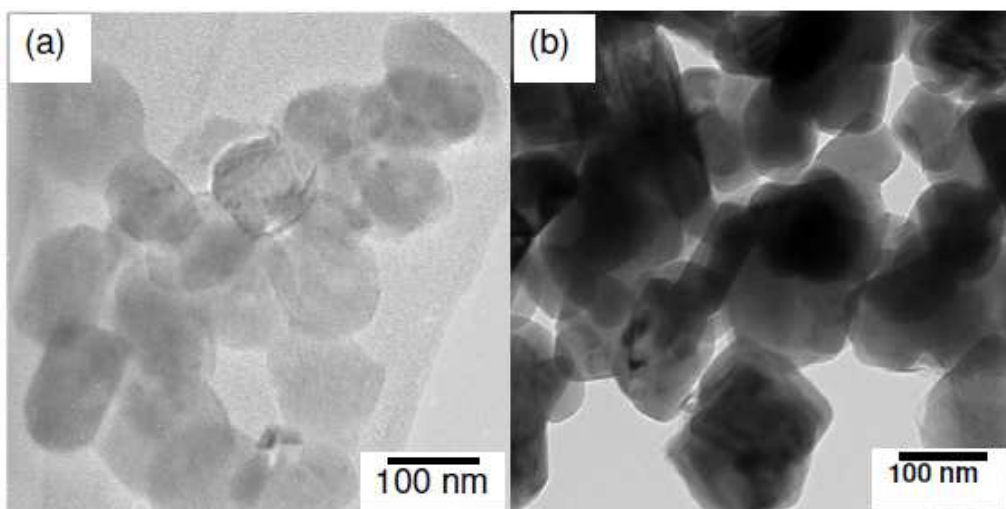

Figure S11. TEM image of lithium metal silicate nanocrystals: (a)  $\text{Li}_2\text{FeSiO}_4$ , (b)  $\text{Li}_2\text{MnSiO}_4$  synthesized at 400 °C.

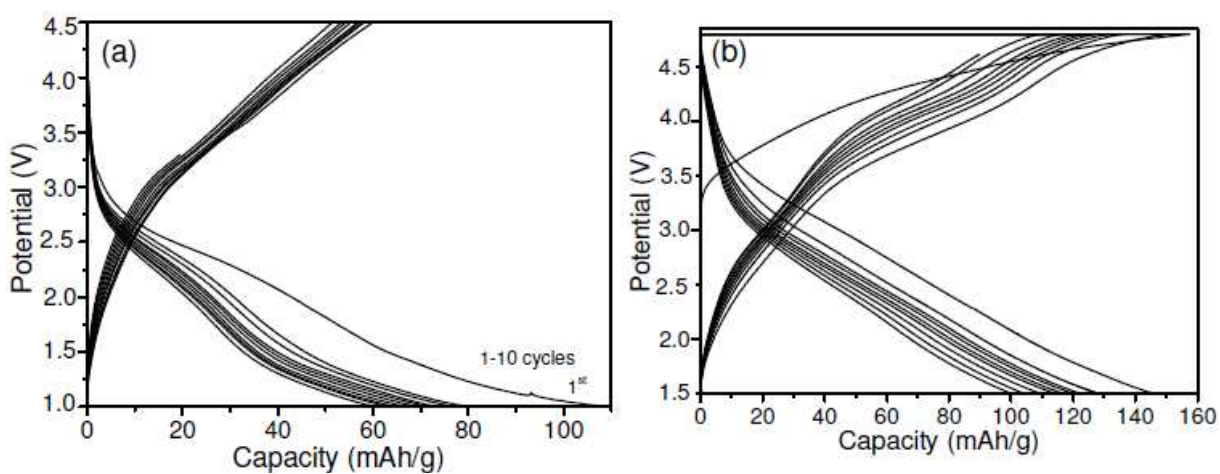

Figure S12. Charge-discharge profile of lithium metal silicate nanocrystals: (a)  $\text{Li}_2\text{FeSiO}_4$  and (b)  $\text{Li}_2\text{MnSiO}_4$  electrode measured at 45 °C. The current rate for charge-discharge measurement was 0.02 C.



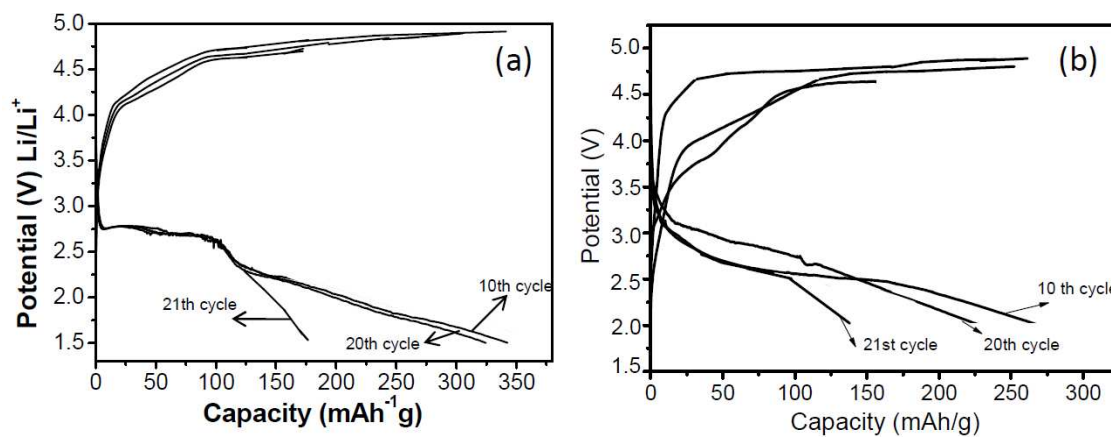

Figure S13. Charge-discharge profile of 10<sup>th</sup> and 20<sup>th</sup> cycles of: (a)  $\text{Li}_2\text{MnSiO}_4$  and (b)  $\text{Li}_2\text{FeSiO}_4$  electrode measured at  $45^\circ\text{C}$ . The current rate for charge-discharge measurement was 0.02 C.
